1 **Distinct Neuronal Populations Contribute to Trace Conditioning and Extinction**  
2 **Learning in the Hippocampal CA1**

3  
4 Kyle R. Hansen\*<sup>1</sup>, Rebecca A. Mount\*<sup>1</sup>, Sudiksha Sridhar<sup>1</sup>, Ali I. Mohammed<sup>1</sup>, Moona  
5 Abdulkerim<sup>1</sup>, Robb Kessel<sup>1</sup>, Bobak Nazer<sup>2</sup>, Howard J. Gritton<sup>#1</sup>, Xue Han<sup>#1</sup>

6  
7 1 – Boston University, Department of Biomedical Engineering, Boston, MA 02215

8 2 – Boston University, Department of Electrical and Computer Engineering, Boston, MA  
9 02215

10 \*,# - Equal contribution

11  
12 **Abstract**

13 Trace conditioning and extinction learning depend on the hippocampus, but it remains  
14 unclear how ongoing neural activities in the hippocampus are modulated during different  
15 learning processes. To explore this question, we performed calcium imaging in a large  
16 number of individual CA1 neurons during both trace eye-blink conditioning and  
17 subsequent extinction learning in mice. Using trial-averaged calcium fluorescence  
18 analysis, we found direct evidence that in real time, as learning emerges, distinct  
19 populations of CA1 cells contribute to trace conditioned learning versus extinction  
20 learning. Furthermore, we examined network connectivity by calculating co-activity  
21 between CA1 neuron pairs, and found that CA1 network connectivity is different between  
22 conditioning and extinction and between correct versus incorrect behavioral responses  
23 during trace conditioned learning. However, the overall connectivity density remains  
24 constant across these behavioral conditions. Together, our results demonstrate that  
25 distinct populations of CA1 neurons, forming different sub-networks with unique  
26 connectivity patterns, encode different aspects of learning.

27 **Introduction**

28 The hippocampus is critical for learning and memory in animals and humans. Early  
29 surgical lesions of the hippocampus in human patients, designed to alleviate intractable

30 epilepsy, resulted in severe memory loss and an inability to form new declarative or  
31 episodic memories<sup>1,2</sup>. Hippocampal atrophy is also associated with diseases related to  
32 memory loss and cognitive decline including dementia and Alzheimer's disease<sup>3-7</sup>. Many  
33 mechanistic studies have highlighted the importance of the hippocampus for spatial,  
34 contextual, and associative learning in a variety of animal models<sup>8,9</sup>.

35 Various experimental paradigms have been devised to probe hippocampal-  
36 dependent forms of learning and memory. One such well-established paradigm is trace  
37 eye blink conditioning, which requires an intact hippocampus<sup>10-12</sup>. In this experimental  
38 design, subjects are presented with a conditioned stimulus (CS), such as a tone or light,  
39 which reliably predicts an unconditioned stimulus (US), such as a puff of air or electrical  
40 shock delivered to the subject's eyelid. In trace conditioning, the CS and US are separated  
41 temporally by a quiescent trace interval. Over time, subjects will learn to associate the CS  
42 with the US, generating a behavioral conditioned response to the CS<sup>13-18</sup>. Trace  
43 conditioning acquisition depends on signaling at both nicotinic and muscarinic  
44 acetylcholine receptors (AChRs)<sup>19-26</sup> and is mediated through NMDA receptor-dependent  
45 plasticity<sup>27</sup>.

46 The hippocampus is also required for context-dependent extinction learning<sup>11</sup>.  
47 Extinction learning is traditionally considered new learning that overrides a previously  
48 learned relationship. In the example of trace conditioning, the subject learns that the  
49 previously established CS is no longer predictive of a subsequent US. Extinction learning  
50 after trace conditioning can be tested by the presentation of the CS without the associated  
51 US, and monitoring the strength or presence of a conditioned response. As new learning  
52 occurs, subjects will suppress their conditioned response to the previously predictive tone

53 or light. Extinction learning has also been shown to be NMDA receptor dependent<sup>28</sup>, and  
54 requires the involvement of hippocampal inhibitory neurons<sup>29</sup> and adult neurogenesis<sup>30</sup>.

55 While the hippocampus is known to be important in both trace conditioning and  
56 extinction learning, it remains largely unknown how individual hippocampal neurons  
57 selectively participate in this learning. Two distinct functional populations related to fear  
58 conditioning and extinction have been reported in the amygdala<sup>31</sup>, and segregated  
59 populations of hippocampal CA1 neurons upregulate different genes for both fear  
60 conditioning and context-dependent fear extinction<sup>32</sup>, supporting the idea that trace  
61 conditioning and extinction learning involve distinct learning mechanisms encoded by  
62 different neurons. However, changes in CA1 populations were quantified at later time  
63 points, after learning occurred, leaving in question whether neural activity changes during  
64 learning, or is a result of plasticity changes in the minutes to hours after new learning. In  
65 this study, we sought to measure the ongoing neuronal activity of individual neurons  
66 during trace eye-blink conditioning and subsequent extinction learning to better  
67 understand the time course and mechanics of how these two types of learning might  
68 interact in the neural population.

69 In order to address these questions, we performed calcium imaging of individual  
70 CA1 neurons in mice over multiple days during the course of trace eye-blink conditioning.  
71 Calcium imaging allows us to measure hundreds to thousands of neurons simultaneously  
72 with single-cell resolution, across multiple trials and multiple days of learning<sup>33,34</sup>. Once  
73 conditioning was achieved, mice underwent a final conditioning session followed by  
74 extinction training, enabling us to track the same neuron population during both learning  
75 paradigms. Hippocampal-dependent trace conditioning is a learning task well suited to

76 calcium imaging because learning, and the associated CA1 neuronal responses, evolves  
77 gradually, unlike fear conditioning, where learning can occur as rapidly as a single trial.

78 Using trial-averaged approaches we found that a significant fraction of CA1  
79 neurons showed CS-related responses for both trace conditioning and extinction learning.  
80 However, the identities of the cells differed between trace conditioning and extinction  
81 learning, suggesting two functionally distinct sub-populations of cells within the  
82 hippocampus CA1. To further understand how the neural populations reflect learning as  
83 it is occurring, we analyzed co-activity between CA1 neuron pairs on a trial-by-trial basis.  
84 Using this trial-by-trial analysis method, we found that populations of neuron pairs are  
85 differentially activated during trace conditioning versus extinction learning. In addition, this  
86 method revealed that during trace conditioning, neurons are also differentially co-active  
87 on trials during which the animal exhibited the “correct” versus the “incorrect” behavioral  
88 response, highlighting the potential of trial-by-trial co-activity analysis to detect features  
89 of network response.

## 90 **Results**

### 91 **Conditioned responding increases across trace-conditioning sessions in a** 92 **classical eye blink task and decreases during extinction**

93 Trace conditioning experiments were performed in head-fixed mice (n=9 mice) that  
94 were positioned under a custom-built wide-field microscope (Figure 1A) equipped with a  
95 scientific (sCMOS) camera, as previously described<sup>33</sup>. Calcium activity in CA1 neurons  
96 was monitored via GCaMP6f fluorescence, which allows recording from hundreds of  
97 neurons simultaneously<sup>35–40</sup> (Figure 1A). Prior to imaging, mice were injected with AAV-  
98 Syn-GCaMP6f and implanted with a custom window that allowed optical access to dorsal  
99 CA1 (Figure 1C). 4-6 weeks after surgery, mice were habituated and then trained on a

100 classic trace eye-blink conditioning paradigm followed by an extinction training session  
101 (Figure 1B). The paradigm consisted of a 9500Hz, 350ms tone as a conditioned stimulus  
102 (CS), followed by a 250ms trace interval, followed by a 100ms gentle puff of air to one  
103 eye that served as the unconditioned stimulus (US) (Figure 1D). Eye behavior was  
104 monitored with a USB 3.0 Camera (Figure 1A,Ei). Animals were trained for 60-80 CS-US  
105 trials over 5-9 days, until they reached conditioned response criterion (conditioned  
106 response on 65% of trials). After reliable conditioned response to CS presentations was  
107 established, on the final day of imaging animals were given a block of 20-40 CS-US trials  
108 (last training session), followed by a block of CS-only extinction trials, where the CS was  
109 not followed by the US (extinction session, Figure 1B). In this paradigm, we could perform  
110 calcium imaging of the same neurons during both learning conditions, allowing us to track  
111 how activity of each neuron changes during extinction acquisition.

112 Behavioral response was quantified by segmenting the eye videos and averaging  
113 each frame to calculate a temporal trace of eyelid movement (Figure 1Ei-iii). A movement  
114 threshold was calculated for each eye trace, fit to a uniform distribution equal to the  
115 average eye size. This thresholding method provided a consistent evaluation of  
116 behavioral response for each session across mice: eye closure with an amplitude above  
117 the threshold between the tone onset and puff onset (tone-puff window) was classified as  
118 a conditioned response (Figure 1Ei-Eiv). Using this method, we were able to track the  
119 strength of the response to the CS, as well as the strong, persistent eye closure in  
120 response to the aversive US on each trial (Figure 1Eiv). This method also allows for  
121 consistent calculation of conditioned response within the training session (Figure 1Eiv-  
122 1Ev) and across days (Figure 2A). Behavior was measured and scored according to this

123 metric across mice. Animals consistently showed more conditioned responding in the final  
124 20 trials of the last training session ( $70 \pm 11\%$ , mean  $\pm$  s.d.) compared to the first 10 trials  
125 from the first training session ( $49 \pm 26\%$ , mean  $\pm$  s.d.,  $p=0.0278$ , one-tailed paired t-test,  
126  $\alpha<0.05$  after Benjamini-Hochberg procedure). Additionally, animals consistently  
127 exhibited decreased conditioning responding during the final 20 trials of the extinction  
128 session ( $45 \pm 21\%$ , mean  $\pm$  s.d.,  $p=0.0134$ , one-tailed paired t-test,  $\alpha<0.025$  after  
129 Benjamini-Hochberg procedure) (Figure 2A-B).

### 130 **Calcium dynamics in CA1 reflect the behavioral responses during trace** 131 **conditioning**

132 Imaging CA1 during trace conditioning allowed us to evaluate how activities of  
133 large neuron populations ( $324 \pm 246$  cells from  $n=8$  mice, mean  $\pm$  s.d.) are modulated  
134 between the first and final day of conditioning training. Furthermore, when extinction was  
135 introduced, we imaged the same neurons during trace conditioning and extinction  
136 learning, enabling us to investigate whether conditioning and extinction recruit unique cell  
137 populations or repurpose the same population. In order to assess the activity of individual  
138 cells, imaging sessions underwent several stages of processing. Videos were motion  
139 corrected, a projection image was generated across each video, cells were segmented  
140 using a semi-automated software, and fluorescence traces for each cell were extracted  
141 and normalized for each imaging session (Figure 1C).

142 A distinct pattern of neuronal responses within the CA1 emerged after multiple  
143 days of trace conditioning (Figure 2Ci-Cii). Neuronal responses for each cell were  
144 averaged across all trials, and the entire population was sorted by average response  
145 intensity during the time period between the tone onset and puff onset (tone-puff window).  
146 During the last training session, after multiple days of conditioning, substantially more

147 neurons ( $11.3 \pm 6.2\%$ : mean  $\pm$  s.d) exhibited an increased calcium response between the  
148 tone and puff, compared to the first day of training ( $5.6 \pm 3.7\%$ : mean  $\pm$  s.d.,  $p=0.0463$ ,  
149 one-tailed paired t-test, Figure 2Ci-ii,D), suggesting enhanced CA1 recruitment across  
150 training sessions. The percentages of cells that responded on the first and last sessions  
151 of training were both significantly greater than the percentages expected by chance  
152 (bootstrapped estimation, both:  $N=1000$ ,  $p=0.026$  &  $0.016$  for first and last session  
153 respectively, one-tailed bootstrap,  $\alpha=0.05$ , Supp. Figure 1A). These findings suggest  
154 that CA1 neurons begin to encode the CS on the first day of training, and the number of  
155 neurons encoding the CS increased over several days of conditioning training.

### 156 **Extinction learning rapidly recruits new CA1 neurons**

157 The last imaging day included a CS-US training session (referred to as “last  
158 training session”) immediately followed by 40 CS-only trials (“extinction session”),  
159 allowing all cells to be matched between the two sessions. Behavioral analysis revealed  
160 that conditioned responding was significantly reduced as a result of extinction training  
161 (Figure 2B). When neuronal responses were averaged together and analyzed as  
162 described above, we found that  $8.3 \pm 5.4\%$  (mean  $\pm$  s.d.) of cells were responsive to CS  
163 during extinction session, which is significantly higher than the percentage expected by  
164 chance (bootstrapped estimation, extinction:  $N=1000$ ,  $p=0.011$ , one-tailed bootstrap,  
165  $\alpha=0.05$ , Supp. Figure 1B).

166 We compared the responses of individual cells to the CS during conditioning trials  
167 and extinction trials by plotting the neuronal responses of the entire population during the  
168 extinction session, but maintaining the sorting determined from the last training session.  
169 Interestingly, we discovered that most ( $78.2 \pm 15.7\%$ : mean  $\pm$  s.d.) of the responsive cells  
170 during conditioning were no longer responsive during the extinction session (Figure 2Cii-

171 iii). Further analysis of the responses during the extinction session, but resorting the  
172 population based on the average GCaMP6f fluorescence intensity during the tone-puff  
173 window of the extinction session itself, revealed another population of neurons that were  
174 responsive during extinction (Figure 2Civ). However, these cells were a largely novel  
175 population of cells that were not responsive to the tone during the previous conditioned  
176 learning, as most ( $67.2 \pm 22.3\%$ : mean  $\pm$  s.d.) of the cells responsive during extinction  
177 exhibited no response on the last day of training (Figure 2Ciii-iv). CS-responsive neurons  
178 from the extinction session represented a statistically smaller proportion of the population  
179 relative to the CS-responsive cells from the last training session ( $8.3 \pm 5.4\%$ : mean  $\pm$  s.d.  
180 versus  $11.3 \pm 6.2\%$ : mean  $\pm$  s.d.:  $p=0.016$ , one-tailed paired t-test, Figure 2D).

181 The population of cells that responded to the CS (increased fluorescence during  
182 the tone-puff window) during the last training session were termed conditioned (CO) cells.  
183 In contrast, extinction (EX) cells were determined as those that responded to the CS  
184 during extinction. These populations were largely discrete, as only  $21.8 \pm 15.7\%$  (mean  $\pm$   
185 s.d.) of CO cells were also EX cells, and similarly only  $32.8 \pm 22.3\%$  (mean  $\pm$  s.d.) of EX  
186 cells were also CS cells. These results suggest that during extinction learning, neurons  
187 are recruited to encode tone presentations rapidly and emerge in less than 40 trials.  
188 Additionally, we have identified two largely distinct populations of neurons that respond  
189 to the tone during either conditioning or extinction learning.

### 190 **Temporally and spatially distributed populations of neurons encode learning for** 191 **either trace conditioning or extinction**

192 Because calcium events are sparse, we next considered the reliability of individual  
193 cell activation to the tone under both conditioned and extinction learning. Some cells  
194 showed responses to the CS on multiple conditioning or extinction trials (example CO



195 cells: Figure 3A; example EX cells: Figure 3B). However, most individual CA1 neurons  
196 exhibit highly diverse responses to the tone. CO cells responded to a highly variable  
197 number of trials during the last training session (5-78% of trials across all neurons from  
198 all mice), with a mean of  $11.8 \pm 4.9\%$  (mean  $\pm$  s.d.). Similarly, EX cells responded to 5-  
199 63% of trials during the extinction session, with a mean of  $10.1 \pm 2.7\%$  (mean  $\pm$  s.d.) of  
200 trials during extinction training (Supp. Figure 2). These results indicate that for both  
201 conditioning and extinction, most neurons of the entire population contributed to encoding  
202 only about 10% of total trials in the session.

203 Comparing the spatial distributions of cells suggests that both CO and EX cells are  
204 not significantly clustered near one another than would be expected by a random  
205 distribution of cell types in CA1 (Figure 3C,D).  $3.0 \pm 2.5\%$  (mean  $\pm$  s.d.) of cells within a  
206 100  $\mu\text{m}$  radius of CO cells were other CO cells, which was not significantly different from  
207 that expected by random shuffling of cell identity (shuffled=1.9%, N=1000, p=0.17, one-  
208 tailed bootstrap, alpha=0.05).  $1.6 \pm 1.5\%$  (mean  $\pm$  s.d.) of cells within a 100  $\mu\text{m}$  radius of  
209 EX cells were other EX cells, which was also not significantly higher than expected by a  
210 random shuffling of cell identity (shuffled=1.3%, N=1000, p=0.24, one-tailed bootstrap,  
211 alpha=0.05). These analyses reveal that individual CO cells and EX cells respond on a  
212 sparse subset of trials, and that CO and EX cells were heterogeneously distributed within  
213 the CA1.

#### 214 **Co-occurrence analysis reveals differential connectivity between sub-populations** 215 **of neurons during either trace conditioning or extinction learning**

216 Most CO and EX neurons identified from trial-averaged responses responded on  
217 a relatively small percentage of trials, and some cells were so sparsely activated in  
218 response to the CS (Figure 4A) that they failed to reach the threshold to be identified as

219 either a CO or EX cell. Given that the majority of individual cells encode CS presentations  
220 with low response reliability, network or population responses might more faithfully reveal  
221 the role of the CA1 in learning and memory. Thus, we quantified network responses based  
222 on pairwise activity of the cell population on a trial-by-trial basis, which summarizes co-  
223 activity across all neurons in a “co-occurrence matrix”. While pairwise correlation can give  
224 reliable measures over many trials or longer periods of time, the limited number of imaging  
225 data points (12) during the short (600ms) tone-puff window of this study made pairwise  
226 correlation unsuitable for tracking neuronal calcium responses. The presence of activity  
227 during the tone-puff window was determined for each neuron individually by comparing  
228 its calcium response between the tone onset and puff onset to an equal time period before  
229 the tone. For each trial, if a neuron’s calcium response increased during the tone-puff  
230 window, the neuron was assigned a 1, and no increase in activity was assigned a 0  
231 (Figure 4Bi). Taking the outer product of this response vector yielded a co-occurrence  
232 matrix of all cell interactions in the population for a single trial based on the response  
233 values during the tone-puff window (Figure 4Bii). These single trial co-occurrence  
234 matrices were combined on specific subsets of trials and clustered using spectral  
235 biclustering to identify neurons that were highly co-modulated for those trials<sup>41</sup> (Figure  
236 4Bii).

237 Co-occurrence matrices were first generated for the last training session, and  
238 clustering was performed on each matrix to identify sub-populations of neurons that were  
239 co-active during the last session (Figure 4Ci). Co-occurrence matrices were then  
240 generated for the extinction session, but the sorting within each extinction matrix was  
241 maintained from the last training session matrix (Figure 4Cii). Similarly to our results

242 observed with trial-averaged responses, the co-active sub-populations identified during  
243 the last training session mostly are not co-active during the extinction session. Re-  
244 clustering the extinction session matrix revealed new clusters of highly co-active neuron  
245 pairs on extinction trials (Figure 4Ciii).

246         These findings indicate that the pattern of activity within the entire CA1 population  
247 as a network is different between the last session and extinction session. To quantify  
248 network connectivity, we anatomically mapped co-activity as edges between co-active  
249 neurons (nodes) to generate network maps for the last training session and extinction  
250 session (Figure 4Di). We found a non-significant difference in the number of edges  
251 present in the last training session versus extinction session ( $34.0 \pm 18.4\%$  vs.  $66.0 \pm$   
252  $18.4\%$ : mean  $\pm$  s.d. of the total edges of the last training and extinction sessions  
253 combined,  $p=0.0550$ , two-tailed paired t-test, Figure 4E). Additionally, the connectivity  
254 density and average degree of the two maps across all mice were not significantly  
255 different from one another ( $p=0.218$  &  $0.6022$  for density and degree respectively, two-  
256 tailed independent t-test, Supp. Figure 3). When we overlaid the last training and  
257 extinction session maps for individual animals, however, we noticed that the edges were  
258 largely distinct (Figure 5Cii-iii), with only  $5.1 \pm 3.4\%$  (mean  $\pm$  s.d.) of total edges appearing  
259 on both the last training session and extinction session maps across animals (significantly  
260 smaller than the total number of edges in both behavioral conditions,  $p=0.0023$  &  $0.0001$   
261 for last training and extinction sessions versus shared edges respectively, two-tailed  
262 paired t-test, Figure 5D). These findings indicate that while largely different pairs of  
263 neurons are co-active during the last training session versus the extinction session, the

264 involvement of the overall CA1 network (the connectivity density) remains constant during  
265 these two behaviors.

266 **Behavioral response during individual trials involves differential connectivity**  
267 **between CA1 neuron pairs**

268 Because the co-occurrence matrix is based on individual trial responses, we used  
269 the co-occurrence matrix clustering technique to visualize the co-active neuron  
270 populations during “correct” versus “incorrect” trials based on the animal’s behavioral  
271 response in the last conditioning session. A correct trial was one in which the animal  
272 exhibited a conditioned response, and an incorrect trial was one in which the animal failed  
273 to produce a conditioned response. We first generated a co-occurrence matrix for correct  
274 trials only, and clustering this matrix revealed sub-populations of neurons that were co-  
275 active during correct trials (Figure 5Ai). We then generated a co-occurrence matrix for  
276 incorrect trials, but maintained the sorting of the correct trials matrix (Figure 5Aii). Most of  
277 the neuron pairs that were co-active during correct trials were not co-active during  
278 incorrect trials. Re-clustering the incorrect trials matrix reveals separate sub-populations  
279 of cells that were co-active on incorrect trials (Figure 5Aiii).

280 We generated network maps for both correct and incorrect trial co-occurrence  
281 matrices to again investigate differences in activity patterns (Figure 5Bi). The correct trials  
282 map included  $66.6 \pm 22.8\%$  (mean  $\pm$  s.d.) of the total edges present during the last training  
283 session and the incorrect trials map included  $38.7 \pm 21.6\%$  (mean  $\pm$  s.d.) of these total  
284 edges ( $p=0.1355$ , two-tailed paired t-test, Figure 5C). The connectivity density and  
285 average degree of the incorrect trials network map were slightly smaller than those for  
286 the correct trials map, but not significantly ( $p=0.2258$  &  $0.2849$  for density and degree  
287 respectively, two-tailed independent t-test, Supp. Figure 4). However, the edges were

288 again almost completely distinct (Figure 5Bii-iii). In fact, only  $5.3 \pm 8.0\%$ : (mean  $\pm$  s.d.) of  
289 total edges appear on both the correct and incorrect trial maps ( $p=0.0001$  &  $0.006$  for  
290 correct and incorrect trials versus shared edges respectively, two-tailed paired t-test,  
291 Figure 5C). These findings again highlight the diverse co-activity among neuron pairs in  
292 the same behavioral task, but across different behavioral responses, while maintaining  
293 the overall CA1 network activation.

294

## 295 **Discussion**

296 In this study, we provide the first detailed, real-time evidence that largely distinct  
297 populations of neurons within the hippocampus respond to a trace conditioned stimulus  
298 during either conditioned learning or extinction learning. It has been previously reported  
299 that two functionally distinct neuron populations are activated by fear conditioning and  
300 extinction in the amygdala<sup>31</sup>. A subsequent study looking at the CA1 region of the  
301 hippocampus in a contextual fear paradigm revealed distinct changes in gene  
302 phosphorylation states in fear conditioning and fear extinction in largely non-overlapping  
303 neural populations<sup>32</sup>. However, in this study, cFos and pERK immuno-activity were used  
304 as markers of conditioning and extinction, and were measured hours to days after the  
305 respective training. These results provided the first important insight into the potential for  
306 distinct population encoding, but the indirect nature of the activity markers and the time  
307 course for immuno-quantification does not allow for the distinction between rapid or  
308 gradual evolution of conditioning and extinction neuron populations. Further, these  
309 markers could be dependent on new protein synthesis or long-term plasticity, and are not  
310 measures of the dynamic learning process that occurs during conditioning and extinction.

311           In order to better understand the dynamic relationship between conditioning and  
312 extinction learning in the hippocampus, and to further investigate whether distinct  
313 populations encode these learning events, we used calcium imaging to monitor the  
314 activity of individual cells throughout conditioning and extinction learning paradigms. We  
315 applied trace conditioning because (1) it lends the advantage of a singular defined  
316 stimulus to which neural activity can be easily aligned and measured between the two  
317 different paradigms, (2) it allows training for both conditioning and extinction to occur in  
318 the same imaging session, and (3) learning during trace conditioning evolves over  
319 multiple trials, unlike fear-based paradigms where learning often occurs over very few  
320 trials. Interestingly, we found that rate of conditioning was highly animal-dependent,  
321 evolving gradually in most animals and rapidly in a subset of mice that showed substantial  
322 responding to the CS within 15-20 trials. Although acquisition of trace eye-blink  
323 conditioning can occur over dozens of trials in a single session<sup>42</sup>, most of our animals  
324 showed gradual acquisition, strongly reflected in the increase in proportion of neurons  
325 that were active during the tone-puff window from the first day to the final, and in the  
326 increase in conditioned response rate after multiple days of training. Overall, our results  
327 support the idea that robust conditioned learning gradually evolves over many days as  
328 new neurons are recruited to encode the stimulus, and reflect previous electrophysiology  
329 studies in rabbits and rats where the time course of learning is slow and evolves through  
330 many CS-US pairings<sup>43,44</sup>. In contrast, extinction learning was rapid across all subjects; a  
331 new population of neurons that responded to the now extinguished tone emerged within  
332 one session of forty trials. Previous work has implicated the prefrontal cortex and septal  
333 cholinergic inputs to be critical to the process of extinction, and these pathways may play

334 a pivotal role in the rapidity of extinction neuron emergence<sup>45–47</sup>. More work will need to  
335 be done on this front to determine whether reducing or silencing these inputs could delay  
336 or block the emergence of extinction-selective neuron populations. In addition, it is  
337 possible that extinction learning can occur rapidly because a meaningful memory schema  
338 already exists. Studies probing updates in location encoding of familiar places suggest  
339 memory re-encoding can occur rapidly for spatial information<sup>48,49</sup>, and our observation for  
340 extinction learning may reflect a manifestation of this principle. Finally, EX neurons were  
341 found embedded in the pyramidal cell layer and were undistinguishable from CO neurons  
342 in terms of their activity profile. This finding suggests that EX neurons are likely excitatory  
343 pyramidal cells, which is consistent with the description of extinction-relevant neurons in  
344 the amygdala and p-ERK+ extinction cells in the hippocampus as excitatory neurons.

345         Given the likelihood that EX cells are excitatory pyramidal cells, it is unlikely that  
346 EX neurons inhibit CO neurons directly, but may instead mediate the activity of  
347 interneurons that have a prominent role in suppressing CO neurons as extinction training  
348 evolves. Since EX activity can emerge rapidly, the mechanism of interaction between CO  
349 and EX activities may be an important future direction that could benefit the treatment of  
350 anxiety-based disorders such as post-traumatic stress disorder (PTSD), which is  
351 characterized by over-generalization of fearful stimuli to neutral contexts and impairments  
352 in development of extinction learning<sup>50–55</sup>.

353         Calcium imaging is a powerful tool to understand how large populations of neurons  
354 function at the population level. However, when investigating dynamic or rapid network  
355 changes, as in extinction learning, it can be difficult to decode the information present in  
356 the population using traditional analysis techniques. For example, we had low confidence

357 in the pairwise correlation values measured over the brief tone-puff window (600ms, 12  
358 data points) on a trial-by-trial basis. Traditional single-trial analytic approaches usually  
359 cannot find meaningful correlations with such limited data. Thus, our development of a  
360 co-occurrence-based approach provides a robust way to measure and observe the trial-  
361 by-trial evolution of the population responses, and a means to assess some cells'  
362 contributions that might be otherwise overlooked, or overstated, in trial-averaged data.  
363 Additionally, it can be used to break down and compare trials by specific behaviors (i.e.,  
364 correct versus incorrect) or other variables that may change across trials over time.  
365 Finally, the co-occurrence matrix allows us to consider connectivity maps of entire neuron  
366 populations, an intuitive way to visualize and investigate the patterns of neural activation.  
367 Overall, the co-occurrence matrix is a useful technique for monitoring the evolution of  
368 population responses over time from high-dimensional calcium imaging datasets.

369       Using the co-occurrence matrices, we found that CA1 neurons' connectivity  
370 changes drastically between conditioned learning and extinction training, but also  
371 between trials with the correct or incorrect behavioral response during conditioned  
372 learning. While some cell pairs may participate in both learning conditions, pairs of  
373 neurons are differentially activated during different types of learning, indicating a role of  
374 network activation and response in the CA1.

375       Because the co-occurrence matrix provides information at single trial level, it  
376 allows the examination of variations between individual trials. In our analysis of correct  
377 and incorrect trials, we found that on any given trial, a very small number of neurons were  
378 active, indicating that trial encoding may depend on the contributions of large populations  
379 of sparsely active neurons. This provides enlightening information about how the



380 hippocampus may represent and encode behaviorally relevant stimuli. Our results  
381 indicate that on each trial only a subset of the appropriate sub-population is activated to  
382 encode the relevant features of that trial, but also that these subsets work together to  
383 create a larger network that represents learning across an entire session, which may be  
384 critical to the encoding or retrieval of learning and memory in CA1.

## 385 **Materials and Methods**

### 386 ***Animal Surgery and Recovery***

387 All animal procedures were approved by the Boston University Institutional Animal  
388 Care and Use Committee. A total of 9 female C57BL/6 mice, 8–12 week old at the start  
389 of the experiments, were used in these studies (Taconic; Hudson, NY). To estimate  
390 sample size, power analysis was based on effect size differences found in our previous  
391 trace conditioning calcium results recorded in the hippocampus<sup>33</sup>. Power analysis was  
392 performed using G\*Power 3.1.9.6 (<http://www.gpower.hhu.de>), applying a one-tailed  
393 Wilcoxon signed-rank test utilizing  $\alpha = 0.05$  and a power ( $1-\beta$ ) value of 0.80. Following  
394 arrival from the vendor, mice were allowed to habituate to the vivarium for 2+ weeks prior  
395 to surgery. Animals were group housed during this time. Animals first underwent viral  
396 injection surgery targeting the hippocampus under stereotaxic conditions (AP: -2.0 mm,  
397 ML: +1.5 mm, DV: -1.6 mm). Mice were injected with 250 nL of AAV9-Syn-  
398 GCaMP6f.WPRE.SV40 virus obtained from the University of Pennsylvania Vector Core  
399 (titer  $\sim 6 \times 10^{12}$  GC/ml). All injections were made via pulled glass pipettes (diameter: 1.2 mm)  
400 pulled to a sharp point and then broken at the tip to a final inner diameter of  $\sim 20 \mu\text{m}$ . Virus  
401 was delivered via slow pressure ejection (10-15 psi, 15-20 ms pulses delivered at 0.5 Hz).  
402 The pipette was lowered over 3 min and allowed to remain in place for 3 min before

403 infusion began. The rate of the infusion was 100 nL/min. At the conclusion of the infusion,  
404 the pipette remained in place for 10 min before slowly being withdrawn over 2-3 minutes.  
405 Upon complete recovery (7+ days after virus injection, mice underwent a second  
406 procedure for the implantation of a sterilized custom imaging cannula (OD: 0.317 cm, ID:  
407 0.236 cm, height, 2 mm diameter), fitted with a circular coverslip (size 0; OD: 3mm)  
408 adhered using a UV-curable optical adhesive (Norland Products). To access dorsal CA1,  
409 the cortical tissue overlying the hippocampus was carefully aspirated away to expose the  
410 corpus callosum. The white matter was then thinned until the underlying tissue could be  
411 visualized through the surgical microscope. The window was then placed and centered  
412 above the hippocampus. During the same surgery, a custom aluminum head-plate was  
413 attached to the skull, anterior to the imaging cannula.

#### 414 ***Animal Training and Trace Conditioning Behavioral Paradigm***

415 Mice were trained on a trace eye-blink conditioning task similar to what was  
416 described previously<sup>33</sup>. Animals were allowed at least 2 weeks to recover from window  
417 surgeries, followed with an additional 2-4 weeks of handling and habituation to being  
418 head-fixed underneath the microscope (Figure 1Bii). Each animal received at least 3  
419 habituation sessions prior to the first recording day. Habituation was performed in the  
420 dark with the imaging LED illuminated to the same intensity as it would be for recording  
421 sessions.

422 Following habituation, training for the eye-blink conditioning task began. Each trial  
423 consisted of a 350 ms long 9500 Hz tone (conditioned stimulus - CS) at 78-84 dB followed  
424 by a 250 ms trace interval, followed by a 100 ms puff to the eye (unconditioned stimulus  
425 – US) at 4.2-6 psi (Figure 1Bi). The ambient noise level ranged between 55-60 dB. Inter-

426 trial intervals for each presentation were pseudo-randomized within a recording session  
427 with an inter-trial interval of  $35 \pm 5$  seconds. The first 20 recording trials consisted of tone  
428 only presentation without the puff. Animals were then presented with either 60 tone-puff  
429 trials per day for 8 days, or 80 tone-puff trials per day for 4 days. The final recording  
430 session consisted of 20 or 40 tone-puff trials as the last learning session, followed by 40  
431 extinction trials, where the puff was removed but the tone continued for those trials.  
432 Behavioral stimuli were generated using a custom MATLAB script that delivered TTL  
433 pulses for the tone and puff via an I/O interface (USB-6259; National Instruments, Austin,  
434 TX). Behavioral TTL pulses and imaging frame timing were digitized and recorded  
435 (Digidata 1440A; Axon CNS Molecular Devices, San Jose, CA or RZ5D Bioamp  
436 Processor; Tucker Davis Technologies, Alachua, FL) to align behavioral data and imaging  
437 frames.

438 Mouse eye positioning was captured using a Flea3 USB 3.0 camera (FL3-U3-  
439 13S2C-CS; Richmond, BC, Canada) and the Point Grey FlyCapture 2 software, after  
440 illuminating the eye and surrounding area with an IR lamp positioned approximately 0.05-  
441 0.5 meters away from the mouse.

#### 442 ***Wide-field imaging***

443 A custom-built wide-field microscope was used to record neuronal calcium  
444 responses during animal learning and behavior as previously described<sup>33</sup>. Briefly, the  
445 animal was head-fixed below the microscope on an articulating base (SL20 Articulating  
446 Base Ball Stage; Thorlabs Inc, Morganville, NJ) and a custom-machined attachment for  
447 the headbar, with the animal being covered by an elastic self-adherent wrap to reduce  
448 movement during recording. The microscope consisted of a scientific CMOS (sCMOS)

449 camera (ORCA-Flash4.0 LT Digital CMOS camera C11440-42U; Hamamatsu, Boston,  
450 MA) was used in conjunction with standard optics for imaging GCaMP6 and a 10x  
451 magnification objective (Leica N Plan 10 X 0.25 PH1 or Mitutoyo Plan Apo Long WD  
452 Objective 10 X 0.28). Images yielded a field of view 1.343 mm by 1.343 mm (1024x1024  
453 pixels) and were acquired at a 20 Hz sampling rate and stored offline for analysis.

## 454 **Data Analysis**

### 455 *Behavior Eye-Blink Segmentation and Analysis*

456 First, each raw video was segmented using Fiji<sup>56</sup> and the MorphoLibJ plugin<sup>57</sup> to  
457 generate a binary mask video corresponding to the animal's eye. To do so, each frame  
458 of this binary video was summed and normalized by the average eye size to generate a  
459 trace corresponding to the percentage of eye closure over time. First, image stacks were  
460 loaded as grayscale images, Gaussian filtered with a radius of 2, and thresholded to  
461 include only the eye range. Videos were converted to binary, holes were filled, and the  
462 Particle Analyzer feature was used to exclude all ROIs on the edges of the videos above  
463 the thresholded value. The MorphoLibJ plugin<sup>57</sup>, was used to label connected  
464 components with a connectivity of 26. A custom Jython script (StepIntegers.py) was used  
465 to determine the connected components that existed across all image frames, which were  
466 merged into one connected component. Lastly, to capture any additional smaller  
467 connected components that commonly were created at or around the time of blinks,  
468 another custom Jython script (FindModalValues.py) was used to capture these remaining  
469 components which were then merged into the final connected component. All other  
470 connected components not a part of this singular merged component were dropped from  
471 the binary mask stack which was saved for eye-blink trace generation.

472 Eye-blink traces over time were generated by summing the binary pixels corresponding  
473 to the segmented eye in each video frame and dividing by the average eye size across  
474 the whole video. An eye conditioned response was classified by calculating a threshold  
475 of deviation from the standard eye sizing. The threshold was calculated by fitting a line  
476 to the central 95 percentile of the full eye-trace, and a deviation of eye size below 2%  
477 from this line was classified as a conditioned response. This is equivalent to when the  
478 residuals deviated by 2% from a uniform distribution fit to the eye trace that was equal to  
479 the average eye size. Each time the eye-trace showed a decrease below this threshold  
480 between the tone onset and puff onset, that trial was classified as a conditioned response  
481 trial. For comparison of behavioral performance, the final 20 trials of behavioral  
482 responding were selected for analysis from the extinction training session and the final  
483 training session. Conditioned responding measured from the first session was limited to  
484 the initial 10 trials. Trials were divided as such to capture periods of stability within the  
485 process of learning, as speed of learning acquisition varied between individual mice.

#### 486 *Movement Correction*

487 Motion correction of videos was done using *ptmc*, an open-source, parallel python  
488 version ([github.com/HanLabBU/ptmc](https://github.com/HanLabBU/ptmc)) of an image stabilization process published  
489 previously<sup>33</sup>. Briefly, each frame was motion corrected by median filtering each image to  
490 remove noise, homomorphic filtering the image for edge detection, and comparing the  
491 frame with a reference image to determine how many pixels to shift that specific frame.  
492 This process was run in parallel by first motion correcting the first multi-page tiff stack  
493 (2047 frames) with to an average projection image of the noisy, non-corrected video. This  
494 corrected video stack was used to generate a new reference image that was sent out in

495 parallel with every frame across the whole video, including the first tiff stack used to  
496 generate the reference.

#### 497 *Neuronal Trace Extraction*

498 After motion correction, regions-of-interest (ROIs) corresponding to cells were  
499 selected using a semi-automated custom written MATLAB software called *SemiSeg*  
500 ([github.com/HanLabBU/SemiSeg](https://github.com/HanLabBU/SemiSeg)). First, a projection image (Max-minus-Min) across the  
501 whole video stack was calculated for selecting ROIs. This static frame was loaded into  
502 *SemiSeg* and the full boundary of the ROIs was selected by a user selecting a sub-region  
503 of the image that was thresholded to determine the corresponding pixels within that region  
504 that correspond to a cell. After all cells were selected from the projection image, pixels  
505 corresponding to these ROIs were averaged together spatially to calculate a temporal  
506 trace for each neuron.

507 For sessions where ROIs were matched to one another, spatial ROI maps were  
508 co-registered using frame-wise cross-correlation. ROIs were then matched using a  
509 greedy method that required the centroid of cells to be within 50 pixels of one another  
510 and had to have at least 50% of their pixels overlap, as was published previously<sup>58</sup>. Cells  
511 that did not meet both of those criteria were removed from the matched dataset for  
512 comparison.

#### 513 *Fluorescence Trace Normalization*

514 Each neuron's fluorescence trace was normalized after a local background  
515 subtraction calculated for each trace. A local background trace was calculated by finding  
516 the centroid for each ROI, and measuring a circle approximately 10 cell widths in radius  
517 (100 pixels) and subtracting the area for the ROI from that circle. The pixels in this local

518 background were averaged together spatially to measure a temporal background trace.  
519 Background traces were subtracted from each cell's measured trace to remove local  
520 fluctuations from scattering in wide-field imaging. The baseline calcium level was  
521 calculated for each cell by fitting a normal distribution to the lowest 50 percentile of the  
522 data and using the mean of this distribution as the baseline calcium level. This baseline  
523 was subtracted from each locally corrected trace, and data was scaled by 5% of the  
524 maximum range of the full calcium trace.

#### 525 *Determination of Increased Activity Cells*

526 For trial-averaged analysis, all trials of the last training session were included.  
527 Fluorescence for the 12 data points (600 ms) within the interval between tone onset and  
528 puff onset (tone-puff window) was compared to the 12 data points prior to the tone. As  
529 cells might have only randomly responded once across all trials during this time window,  
530 a threshold was selected to capture cells with regularly occurring or very strong responses  
531 to the tone. Thus, a cell was classified as having increased if the average fluorescence  
532 during the tone-puff window was larger than the average fluorescence for the pre-tone  
533 window by 0.15. This 0.15 value is equivalent to a neuron having a several 5% increases  
534 (normalized value of 1) on at least 6 trials on one end of the spectrum, or one large 30%  
535 increase (normalized value of 6) on the other end of the spectrum. This was the threshold  
536 used for all statistics and for comparison with the network measure. All cells that  
537 increased in fluorescence by this 0.15 value during the last training session or extinction  
538 session were deemed conditioned (CO) or extinction (EX) cells, respectively.

539

540

541 *Bootstrapping Procedure*

542 Trial-averaged bootstraps were calculated for each mouse to determine what  
543 percentages of cells would be expected to increase in random recordings not tied to the  
544 tone-puff learning paradigm. Timing between each pseudo-randomized tone-puff was  
545 maintained to account for any periodicity effects during the recording, and bootstraps  
546 were calculated by circularly permuting the tone-puff timing across all traces. The number  
547 of shuffled permutations performed was 1000 for each mouse. The timing of each new  
548 randomized tone-puff was averaged together across all shuffled trials, and the percentage  
549 of cells that increased between the tone and puff was measured. The percentage of cells  
550 increased for each mouse was averaged together to get a population estimation of the  
551 mean number of cells expected to increase within the population, which could be  
552 compared to the measured percentage of the population that increased between the  
553 actual tone-puff across all trials.

554 *Spatial Cell Identity Bootstrapping*

555 Bootstraps of shuffled cell identity distributions were calculated for comparison  
556 against the observed distribution of cell identities. A 100 micron radius (76 pixels at 1.312  
557 microns/pixel) was drawn around each cell. The number of segmented cells that existed  
558 within that spatial distribution were calculated and a percentage of either CO or EX cells  
559 was determined from the cell identities from the cells within that radius. For bootstrapping,  
560 the same number of CO or EX cells that was segmented for each recording session were  
561 randomly selected and the same calculation within a 100 micron radius was calculated.  
562 The measured percentages were then compared to the bootstrapped values for statistical  
563 confidence.



## 564 *Co-Occurrence Network Creation*

565 Individual trial co-occurrence matrices were created for each pair of cells across  
566 every trial. For consistency in the co-occurrence analysis, the last 20 trials of the last  
567 training session were included. For each tone-puff window, the mean value of the 600 ms  
568 (12 data points) between the tone onset and puff onset was compared to the 600 ms  
569 before the tone. If this value was greater than 1 on a normalized trace, corresponding to  
570 5% the maximum peak value of a trace, then the neuron was labelled as responding. The  
571 result was a binary vector of 0s and 1s of length N, where N is the number of cells  
572 recorded in the population. The outer product of this vector was taken with itself for the  
573 whole population to yield an NxN co-occurrence matrix. This matrix is 1 if both the ith  
574 and jth cells were activated between the tone-puff, and 0 otherwise.

575 Once a co-occurrence network was generated for each trial, they could be  
576 combined for further analyses by summing on certain trials of interest. For this analysis,  
577 co-occurrence matrices were summed across either the last training session, the  
578 extinction session, “correct” trials of the last training session, or “incorrect” trials of the last  
579 training session. Once a trial combination map was created, spectral biclustering was  
580 performed for a 3x3 cluster pattern using the Python machine learning package scikit-  
581 learn<sup>41,59</sup>.

## 582 *Network Map Generation*

583 Anatomical spatial information was combined with the co-occurrence matrix to  
584 generate network maps using the Python library NetworkX. The centroid of each ROI was  
585 used as the position of the corresponding node, which represent the cells of the imaging  
586 session. Since the co-occurrence matrix is symmetric, the lower triangular matrix is used

587 to generate the edges of the network. Co-activity between two cells is represented as an  
588 edge between the corresponding nodes. For example, the  $i$ th cell and  $j$ th cell would be  
589 connected by an edge if  $A_{i,j}$  is non-zero, where  $A$  is the  $N \times N$  co-occurrence matrix. The  
590 combined map of correct and incorrect edges was created by summing the co-occurrence  
591 matrices of correct and incorrect trials of the last training session.

### 592 *Quantification of Network Properties*

593 Percentage of edges in each correct or incorrect network is calculated as:

$$594 \quad \frac{E_i}{E_s} \times 100$$

595 where  $E_i$  is total edges in the individual network and  $E_s$  is total edges in the session  
596 network (comprised of both correct and incorrect trial edges). Percentage of shared  
597 edges is calculated as:

$$598 \quad \frac{(E_c + E_{ic}) - E_s}{E_s} \times 100$$

599 where  $E_c$  is total edges in correct network and  $E_{ic}$  is total edges in incorrect network.

600 Python package NetworkX was used to calculate network density, which is defined  
601 as:

$$602 \quad \frac{2m}{n(n-1)}$$

603 and degree is defined as:

$$604 \quad \frac{2m}{n}$$

605 where  $m$  is number of edges and  $n$  is number of nodes.

606

607

608 **Acknowledgements**

609 K.R.H. and S.S. performed data analysis. R.A.M., H.J.G., and A.I.M. conducted the  
610 animal experiments. M.A. and R.K. helped with animal husbandry, habituation, and  
611 training. B.N. helped with data analysis. R.A.M., K.R.H., H.J.G., and X.H. wrote the  
612 manuscript. X.H. supervised the study.

613 **Funding**

614 X.H. acknowledges funding from NSF CBET-1848029, NIH (1R01MH122971-01A1,  
615 1R21MH109941-01), Boston University Dean's Catalyst Award, National Academy of  
616 Engineering, and The Grainger Foundation, Inc. K.R.H. acknowledges funding from NIH  
617 (F31 NS 105420) and NSF (DGE-1247312).

618 **Competing Interests**

619 The authors have no competing financial interests.

620

621

## 622 References

- 623 1. Scoville, W. B. & Milner, B. LOSS OF RECENT MEMORY AFTER BILATERAL  
624 HIPPOCAMPAL LESIONS. *J. Neurol. Neurosurg. Psychiatry* **20**, 11–21 (1957).
- 625 2. Scoville, W. B. The Limbic Lobe in Man. *J. Neurosurg.* **11**, 64–66 (1954).
- 626 3. Fein, G. *et al.* Hippocampal and cortical atrophy predict dementia in subcortical  
627 ischemic vascular disease. *Neurology* **55**, 1626–35 (2000).
- 628 4. Apostolova, L. G. *et al.* Subregional hippocampal atrophy predicts Alzheimer's  
629 dementia in the cognitively normal. *Neurobiol. Aging* **31**, 1077–88 (2010).
- 630 5. Chow, N. *et al.* Comparing Hippocampal Atrophy in Alzheimer's Dementia and  
631 Dementia with Lewy Bodies. *Dement. Geriatr. Cogn. Disord.* **34**, 44–50 (2012).
- 632 6. Henneman, W. J. P. *et al.* Hippocampal atrophy rates in Alzheimer disease:  
633 Added value over whole brain volume measures. *Neurology* **72**, 999–1007 (2009).
- 634 7. Camicioli, R. *et al.* Parkinson's disease is associated with hippocampal atrophy.  
635 *Mov. Disord.* **18**, 784–790 (2003).
- 636 8. Wirth, S. *et al.* Trial outcome and associative learning signals in the monkey  
637 hippocampus. *Neuron* **61**, 930–940 (2009).
- 638 9. Jarrard, L. E. On the role of the hippocampus in learning and memory in the rat.  
639 *Behav. Neural Biol.* **60**, 9–26 (1993).
- 640 10. McEchron, M. D., Bouwmeester, H., Tseng, W., Weiss, C. & Disterhoft, J. F.  
641 Hippocampectomy disrupts auditory trace fear conditioning and contextual fear  
642 conditioning in the rat. *Hippocampus* **8**, 638–646 (1998).
- 643 11. Moyer, J. R., Deyo, R. A. & Disterhoft, J. F. Hippocampectomy Disrupts Trace  
644 Eye-Blink Conditioning in Rabbits. *Behav. Neurosci.* **129**, 523–532 (2015).
- 645 12. Tseng, W., Guan, R., Disterhoft, J. F. & Weiss, C. Trace eyeblink conditioning is  
646 hippocampally dependent in mice. *Hippocampus* **14**, 58–65 (2004).
- 647 13. Gruart, A. & Delgado-García, J. M. Activity-dependent changes of the  
648 hippocampal CA3-CA1 synapse during the acquisition of associative learning in  
649 conscious mice. *Genes, Brain Behav.* **6**, 24–31 (2007).
- 650 14. Li, J. G., Lehr, M., Liu-Chen, L. Y. & Woodruff-Pak, D. S. Nicotinic acetylcholine  
651 receptors and modulation of learning in 4- and 27-month-old rabbits.  
652 *Neuropsychopharmacology* **33**, 2820–2830 (2008).
- 653 15. McLaughlin, J., Skaggs, H., Churchwell, J. & Powell, D. A. Medial prefrontal  
654 cortex and Pavlovian conditioning: Trace versus delay conditioning. *Behav.*  
655 *Neurosci.* **116**, 37–47 (2002).
- 656 16. Kishimoto, Y., Suzuki, M., Kawahara, S. & Kirino, Y. Age-dependent impairment  
657 of delay and trace eyeblink conditioning in mice. *Neuroreport* **12**, 3349–3352  
658 (2001).
- 659 17. Kronforst-Collins, M. A. & Disterhoft, J. F. Lesions of the caudal area of rabbit  
660 medial prefrontal cortex impair trace eyeblink conditioning. *Neurobiol. Learn.*  
661 *Mem.* **69**, 147–162 (1998).
- 662 18. Takehara-Nishiuchi, K. & McNaughton, B. L. Spontaneous Changes of  
663 Neocortical Code for Associative Memory During Consolidation. *Science (80- )*.  
664 **322**, 960–963 (2008).
- 665 19. Brown, K. L., Comalli, D. M., Biasi, M. De & Woodruff-Pak, D. S. Trace Eyeblink  
666 Conditioning is Impaired in  $\alpha 7$  but not in  $\beta 2$  Nicotinic Acetylcholine Receptor

- 667           Knockout Mice. *Front. Behav. Neurosci.* **4**, 1–9 (2010).
- 668   20.   Disterhoft, J. F. *et al.* Cholinergic Facilitation of Trace Eyeblink Conditioning in  
669       Aging Rabbits. *Life Sci.* **64**, 541–548 (1999).
- 670   21.   Fontán-Lozano, Á., Troncoso, J., Múnera, A., Carrión, Á. M. & Delgado-García, J.  
671       M. Cholinergic septo-hippocampal innervation is required for trace eyeblink  
672       classical conditioning. *Learn. Mem.* **12**, 557–563 (2005).
- 673   22.   Raybuck, J. D. & Gould, T. J. The role of nicotinic acetylcholine receptors in the  
674       medial prefrontal cortex and hippocampus in trace fear conditioning. *Neurobiol.*  
675       *Learn. Mem.* **94**, 353–363 (2010).
- 676   23.   Woodruff-Pak, D. S. Mecamylamine reversal by nicotine and by a partial  $\alpha 7$   
677       nicotinic acetylcholine receptor agonist (GTS-21) in rabbits tested with delay  
678       eyeblink classical conditioning. *Behav. Brain Res.* **143**, 159–167 (2003).
- 679   24.   Woodruff-Pak, D. S., Tobia, M. J., Jiao, X., Beck, K. D. & Servatius, R. J.  
680       Preclinical investigation of the functional effects of memantine and memantine  
681       combined with galantamine or donepezil. *Neuropsychopharmacology* **32**, 1284–  
682       1294 (2007).
- 683   25.   Flesher, M. M., Butt, A. E. & Kinney-Hurd, B. L. Differential acetylcholine release  
684       in the prefrontal cortex and hippocampus during pavlovian trace and delay  
685       conditioning. *Neurobiol. Learn. Mem.* **96**, 181–191 (2011).
- 686   26.   Woodruff-Pak, D. S., Li, Y. T., Kazmi, A. & Kem, W. R. Nicotinic cholinergic  
687       system involvement in eyeblink classical conditioning in rabbits. *Behav. Neurosci.*  
688       **108**, 486–493 (1994).
- 689   27.   Kawahara, S. *et al.* Role of hippocampal NMDA receptors in trace eyeblink  
690       conditioning. *Brain Res.* **1039**, 130–136 (2005).
- 691   28.   Dillon, G. M., Qu, X., Marcus, J. N. & Dodart, J. C. Excitotoxic lesions restricted to  
692       the dorsal CA1 field of the hippocampus impair spatial memory and extinction  
693       learning in C57BL/6 mice. *Neurobiol. Learn. Mem.* **90**, 426–433 (2008).
- 694   29.   Lissek, S., Golisch, A., Glaubitz, B. & Tegenthoff, M. The GABAergic system in  
695       prefrontal cortex and hippocampus modulates context-related extinction learning  
696       and renewal in humans. *Brain Imaging Behav.* **11**, 1885–1900 (2016).
- 697   30.   Catlow, B. J., Song, S., Paredes, D. A., Kirstein, C. L. & Sanchez-Ramos, J.  
698       Effects of psilocybin on hippocampal neurogenesis and extinction of trace fear  
699       conditioning. *Exp. Brain Res.* **228**, 481–491 (2013).
- 700   31.   Herry, C. *et al.* Switching on and off fear by distinct neuronal circuits. *Nature* **454**,  
701       600–606 (2008).
- 702   32.   Tronson, N. C. *et al.* Segregated Populations of Hippocampal Principal CA1  
703       Neurons Mediating Conditioning and Extinction of Contextual Fear. *J. Neurosci.*  
704       **29**, 3387–3394 (2009).
- 705   33.   Mohammed, A. I. *et al.* An integrative approach for analyzing hundreds of neurons  
706       in task performing mice using wide-field calcium imaging. *Sci. Rep.* **6**, (2016).
- 707   34.   Hansen, K. R. *et al.* Mild Blast Injury Produces Acute Changes in Basal  
708       Intracellular Calcium Levels and Activity Patterns in Mouse Hippocampal  
709       Neurons. *J. Neurotrauma* **35**, 1523–1536 (2018).
- 710   35.   Chen, T.-W. *et al.* Ultrasensitive fluorescent proteins for imaging neuronal activity.  
711       *Nature* **499**, 295–300 (2013).
- 712   36.   Akerboom, J. *et al.* Optimization of a GCaMP Calcium Indicator for Neural Activity

- 713 Imaging. *J. Neurosci.* **32**, 13819–13840 (2012).
- 714 37. Wachowiak, M. *et al.* Optical Dissection of Odor Information Processing In Vivo  
715 Using GCaMPs Expressed in Specified Cell Types of the Olfactory Bulb. *J.*  
716 *Neurosci.* **33**, 5285–5300 (2013).
- 717 38. Deneux, T. *et al.* Accurate spike estimation from noisy calcium signals for ultrafast  
718 three-dimensional imaging of large neuronal populations in vivo. *Nat. Commun.* **7**,  
719 (2016).
- 720 39. Badura, A., Sun, X. R., Giovannucci, A., Lynch, L. A. & Wang, S. S.-H. Fast  
721 calcium sensor proteins for monitoring neural activity. *Neurophotonics* **1**, (2014).
- 722 40. Berlin, S. *et al.* Photoactivatable genetically encoded calcium indicators for  
723 targeted neuronal imaging. *Nat. Methods* **12**, 852–858 (2015).
- 724 41. Kluger, Y., Basri, R., Chang, J. T. & Gerstein, M. Spectral Biclustering of  
725 Microarray Data: Co-clustering Genes and Conditions. *Genome Res.* **13**, 703–716  
726 (2003).
- 727 42. Modi, M. N., Dhawale, A. K. & Bhalla, U. S. CA1 cell activity sequences emerge  
728 after reorganization of network correlation structure during associative learning.  
729 *Elife* **2014**, 1–25 (2014).
- 730 43. Berger, T. W., Rinaldi, P. C., Weisz, D. J. & Thompson, R. F. Single-Unit Analysis  
731 of Different Hippocampal Cell Types During Classical Conditioning of Rabbit  
732 Nictitating Membrane Response. *J. Neurophysiol.* **50**, (1983).
- 733 44. Green, J. T. & Arenos, J. D. Hippocampal and Cerebellar Single-Unit Activity  
734 During Delay and Trace Eyeblink Conditioning in the Rat. *Neurobiol. Learn. Mem.*  
735 **87**, 269–284 (2007).
- 736 45. Acquas, E., Wilson, C. & Fibiger, H. C. Conditioned and Unconditioned Stimuli  
737 Increase Frontal Cortical and Hippocampal Acetylcholine Release: Effects of  
738 Novelty, Habituation, and Fear. *J. Neurosci.* **76**, 3089–3096 (1996).
- 739 46. Chang, C., Berke, J. D. & Maren, S. Single-Unit Activity in the Medial Prefrontal  
740 Cortex during Immediate and Delayed Extinction of Fear in Rats. *PLoS One* **5**,  
741 11971 (2010).
- 742 47. Euston, D. R., Gruber, A. J. & McNaughton, B. L. The role of medial prefrontal  
743 cortex in memory and decision making. *Neuron* (2012).  
744 doi:10.1016/j.neuron.2012.12.002
- 745 48. Tse, D. *et al.* Schemas and memory consolidation. *Science (80-. )*. **316**, 76–82  
746 (2007).
- 747 49. McKenzie, S., Robinson, N. T. M., Herrera, L., Churchill, J. C. & Eichenbaum, H.  
748 Learning Causes Reorganization of Neuronal Firing Patterns to Represent  
749 Related Experiences within a Hippocampal Schema. *J. Neurosci.* **33**, 10243–  
750 10256 (2013).
- 751 50. Orr, S. P. *et al.* Predicting post-trauma stress symptoms from pre-trauma  
752 psychophysiological reactivity, personality traits and measures of psychopathology.  
753 *Biol. Mood Anxiety Disord.* **2**, (2012).
- 754 51. Maeng, L. Y. & Milad, M. R. Post-Traumatic Stress Disorder: The Relationship  
755 Between the Fear Response and Chronic Stress. *Chronic Stress* **1**, 1–13 (2017).
- 756 52. Burriss, L., Ayers, E. & Powell, D. A. Combat veterans show normal discrimination  
757 during differential trace eyeblink conditioning, but increased responsivity to the  
758 conditioned and unconditioned stimulus. *J. Psychiatr. Res.* **41**, 785–794 (2007).

- 759 53. Wessa, M. & Flor, H. Failure of Extinction of Fear Responses in Posttraumatic  
760 Stress Disorder: Evidence From Second-Order Conditioning. *Am. J. Psychiatry*  
761 **164**, 1684–1692 (2007).
- 762 54. Garfinkel, S. N. *et al.* Impaired Contextual Modulation of Memories in PTSD: An  
763 fMRI and Psychophysiological Study of Extinction Retention and Fear Renewal. *J.*  
764 *Neurosci.* **34**, 13435–13443 (2014).
- 765 55. Milad, M. R. *et al.* Neurobiological Basis of Failure to Recall Extinction Memory in  
766 Posttraumatic Stress Disorder. *Biol. Psychiatry* **66**, 1075–1082 (2009).
- 767 56. Schindelin, J. *et al.* Fiji: an open-source platform for biological-image analysis.  
768 *Nat. Methods* **9**, 676–82 (2012).
- 769 57. Legland, D., Arganda-Carreras, I. & Andrey, P. MorphoLibJ: integrated library and  
770 plugins for mathematical morphology with ImageJ. *Bioinformatics* **32**, 3532–3534  
771 (2016).
- 772 58. Shen, S. P. *et al.* Automatic Cell Segmentation by Adaptive Thresholding  
773 (ACSAT) for Large-Scale Calcium Imaging Datasets. *eNeuro* **5**, ENEURO.0056-  
774 18.2018 (2018).
- 775 59. Pedregosa, F. *et al.* Scikit-learn: Machine Learning in Python. *J. Mach. Learn.*  
776 *Res.* **12**, 2825–2830 (2011).  
777

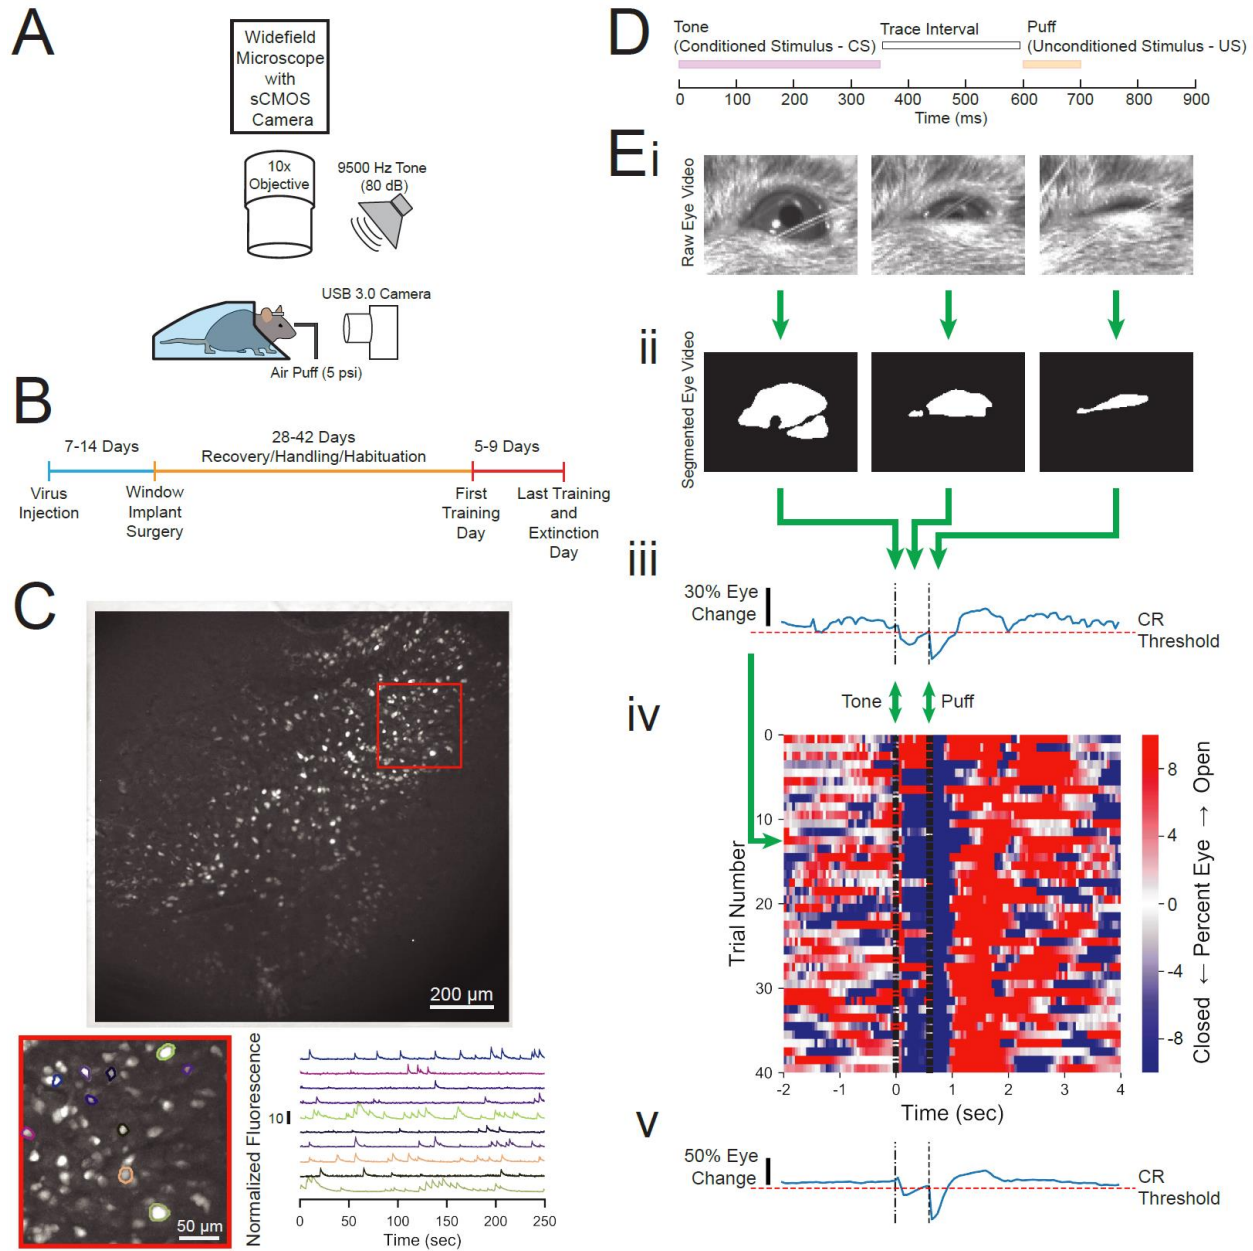

778

779 **Figure 1. Experimental design and measurement of animal behavior. (A)** Imaging  
780 and behavioral setup. The imaging setup consisted of a microscope with a sCMOS  
781 camera, standard wide-field fluorescence optics, and a 10x long working distance  
782 objective to image a head-fixed mouse. For the behavioral paradigm, a speaker was  
783 positioned near the mouse and a cannula for directing an air puff was placed in front of  
784 the right eye. Eye responses were monitored using a USB 3.0 Camera. See methods for



785 full details. **(B)** Experimental timeline. Each animal was injected with AAV-Syn-GCaMP6f  
786 and allowed 1-2 weeks for virus expression before surgical window implantation above  
787 CA1. The first training day was 4-6 weeks after surgery, and animals were trained and  
788 imaged for 5-9 days. **(C)** Full field of view and selected extracted traces. Maximum-  
789 minimum projection for one motion corrected video to show example field of view of  
790 several hundred cells. Inset: Several selected cells and their corresponding normalized  
791 fluorescence trace recordings. **(D)** Within trial design. Trials consisted of a 350 ms tone  
792 as the conditioned stimulus (CS), followed by a 250 ms trace interval with no sound,  
793 followed by a 100 ms puff of air to the eye as the unconditioned stimulus (US). **(E)** Video  
794 eye monitoring and segmentation. **(Ei)** Raw eye frames aligned to the CS, trace interval,  
795 and US windows shown above. **(Eii)** Eye frames after segmentation using Fiji<sup>56</sup> and  
796 MorphoLibJ<sup>57</sup>. **(Eiii)** Extracted eye trace for one trial. Eye movement thresholds were  
797 calculated for each recording and used to classify whether the mouse eyelid moved  
798 enough to constitute a conditioned response. CR – conditioned response. **(Eiv)** Eye trace  
799 for all 40 trials of a first training session from one example mouse. Red indicates eye  
800 opening, while blue indicates eye closure. Most trials show a conditioned response in blue  
801 after the tone but before the puff, and there is a strong blue band after the puff on every  
802 trial. **(Ev)** Extracted eye trace averaged over all trials shown in Eiv.  
803

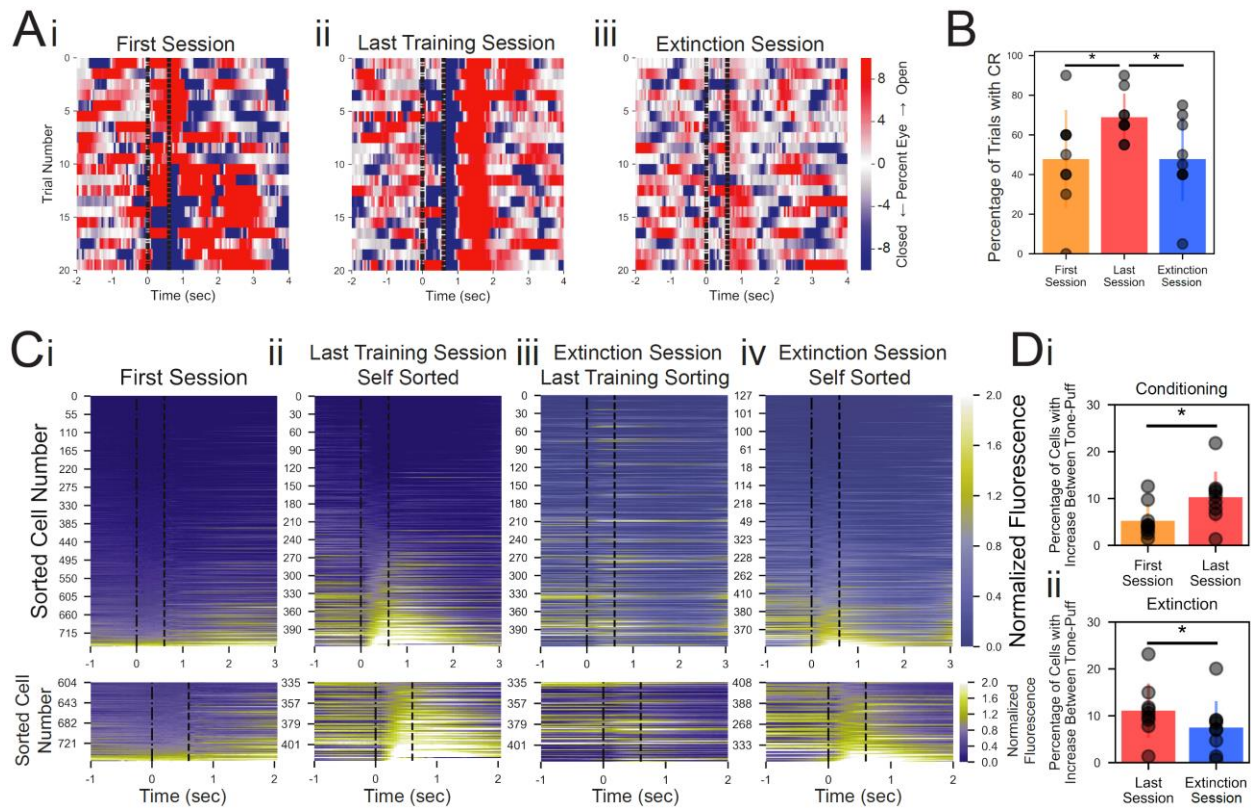

804

805 **Figure 2. Conditioned responses and neuronal calcium responses increase during**

806 **conditioning and decrease during extinction. (A)** Extracted eye traces across days.

807 Red indicates eye opening, while blue indicates eye closure. **(Ai)** Eye trace for 10 tone-

808 only trials and the first 10 trials of the first training session from the same example mouse

809 in Figure 1E. Note the absence of a strong blue band at the time when the puff would

810 normally occur in trials 1-10. Note the absence of blue (indicating absence of conditioned

811 response) during the tone-puff window of the first few training trials (beginning trial 11).

812 **(Aii)** Eye trace for all 20 trials of the last training session for the same example mouse.

813 Note the blue band (indicating conditioned response) during the tone-puff window on most

814 trials throughout the session. **(Aiii)** Eye trace for the last 20 trials of the extinction session

815 for the same example mouse. Note the lack of conditioned response during the tone-puff

816 window on most trials, and note the absence of a strong blue band at the time when the

817 puff would normally occur (as puff is removed during extinction). **(B)** Quantification of  
818 conditioned response for all subjects during the first 10 trials of the first session, last 20  
819 trials of the last session, and last 20 trials of the extinction session. Conditioned response  
820 rate increased between the first and last training sessions, indicating learning among the  
821 mice. Conditioned response rate decreased between the last training session and the  
822 extinction session. CR – conditioned response, \* $p=0.0278$  and  $\alpha<0.05$  for first vs last  
823 session, and  $p=0.0134$  and  $\alpha<0.025$  for last vs extinction session, one-tailed paired  
824 t-test and Benjamini-Hochberg procedure. **(C)** Trial-averaged calcium recordings. **(Ci)**  
825 Top: Trial-averaged recordings sorted by average fluorescence between the tone and the  
826 puff for the first training session from an example mouse. Bottom: Zoomed inset of bottom  
827 20% of cells for first training session. **(Cii)** The same as in Ci, for the last training session  
828 from the same mouse, sorted by average fluorescence between the tone and the puff for  
829 the last training session. More cells showed a consistent trial-averaged response for the  
830 last training session than during the first session, as seen by the green bands between  
831 tone and puff on the last training session. **(Ciii)** Trial-averaged recordings (plotted as in  
832 Ci) of the extinction session, but cell sorting was maintained from the last training session  
833 to look at the spatially matched cells. Maintaining sorting revealed a reduction in response  
834 to the CS in previously CS-responsive neurons. **(Civ)** The same data as shown in Ciii,  
835 but resorted according to the fluorescence between the tone and the puff for the extinction  
836 session. Resorting on the extinction session alone shows a new population of cells  
837 responsive to CS during the extinction session. **(Di)** Quantification of the proportion of  
838 cells responsive to the CS from the first session (yellow) and the last training session  
839 (red), \* $p=0.0463$ , paired one-tailed t-test. **(Dii)** Quantification of the proportion of cells

840 responsive to the CS from the last training session compared to the extinction session

841 (blue), \* $p=0.016$ , paired one-tailed t-test.

842

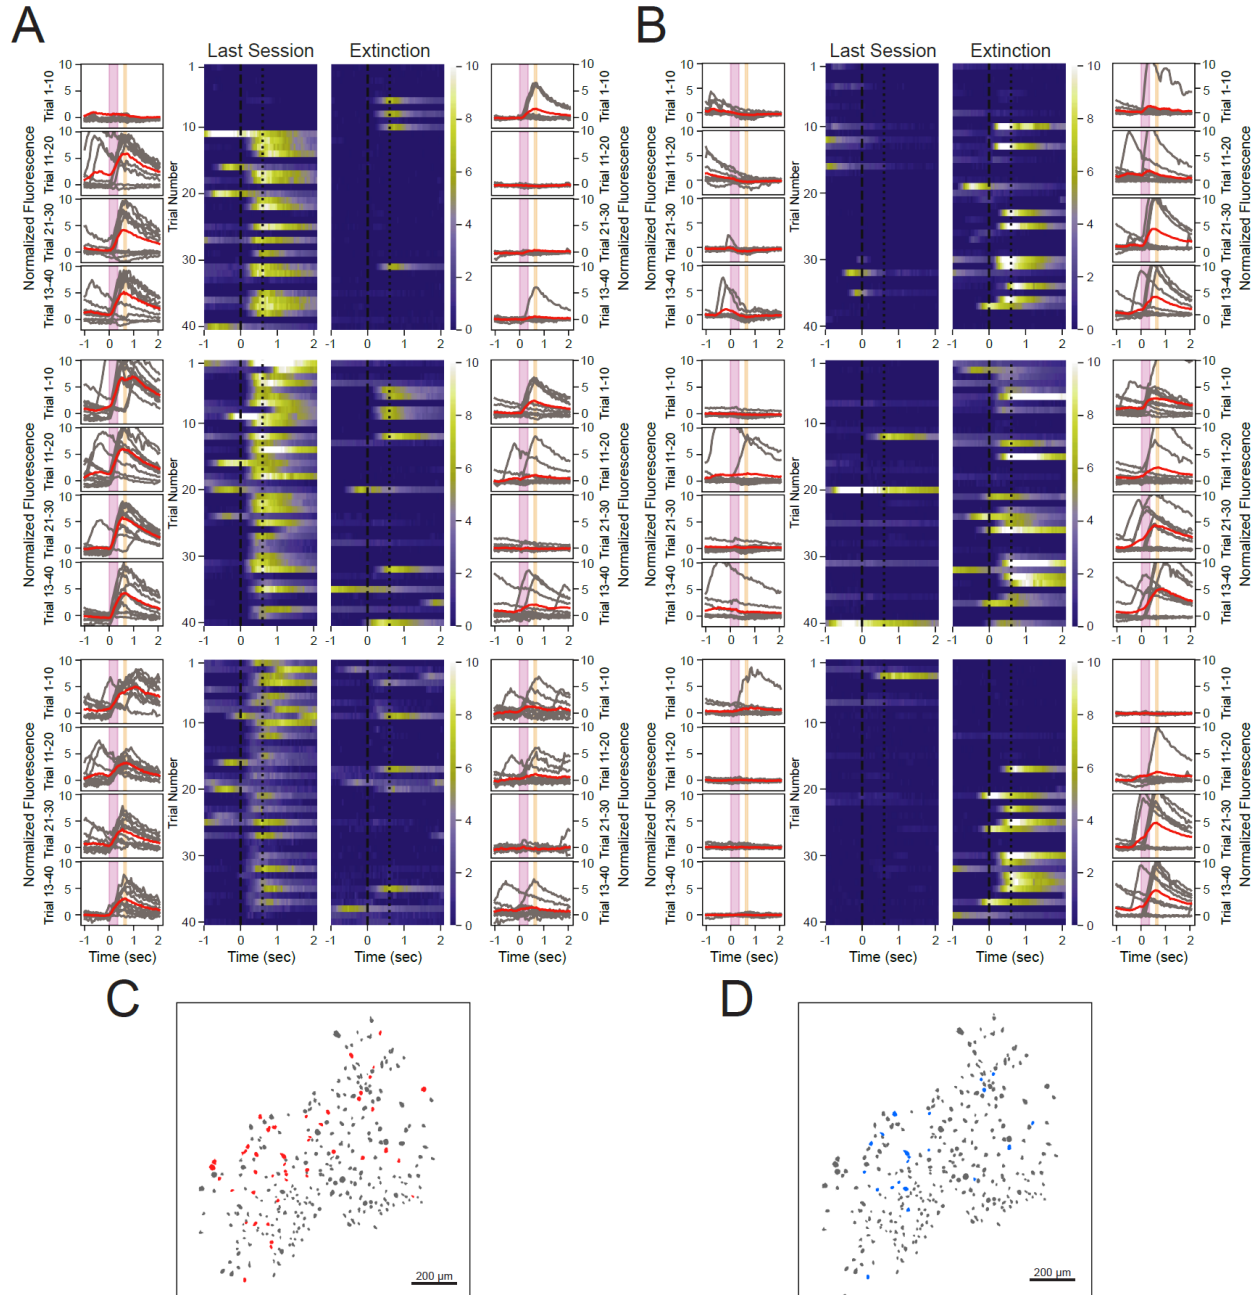

843

844 **Figure 3. Some neurons show robust responses to the tone during either**  
845 **conditioning or extinction learning, but not both. (A) Responses across all trials for**  
846 **three neurons that show a reliable responding during the last training session, termed CO**  
847 **cells. Outer columns are individual trials shown in gray and the average of each 10 trials**  
848 **shown in red. The pink box corresponds to the tone and the orange box corresponds to**

849 the puff. Heat maps in the center show each trial for a 3-second time window surrounding  
850 the tone and puff presentations. Note some responses of these cells on early extinction  
851 trials, but much fewer on later extinction trials. **(B)** The same as in A, for three neurons  
852 that exhibit a reliable responding for extinction trials, termed EX cells. Note the lack of  
853 response of these cells to the tone during the last training session. Also, note that both  
854 the CO and EX cells do not respond on every relevant trial, but show consistent  
855 responding across the full session. **(C)** Spatial maps of all neuron masks from a  
856 representative animal, with CO cells in red and all other cells in gray. **(D)** The same map  
857 as in C, with EX cells in blue and all other cells in gray.  
858

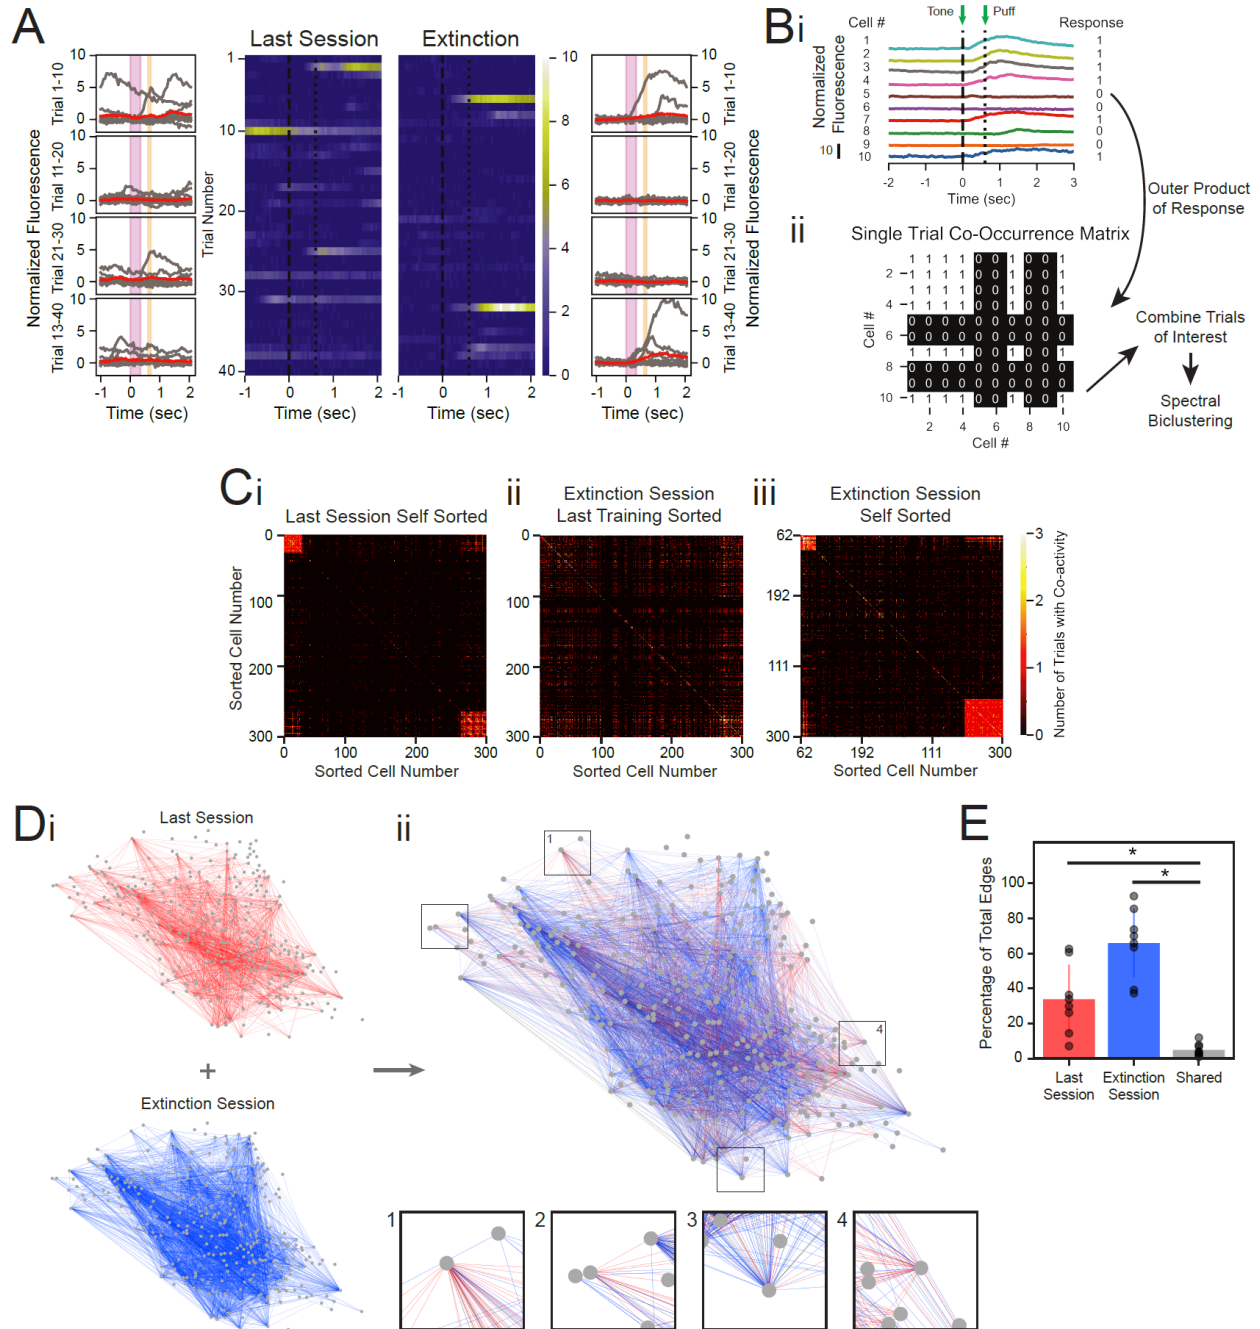

859

860 **Figure 4. Co-occurrence analysis provides a measure of population activity across**

861 **individual trials. (A)** Non-classified cell (neither CO nor EX) that highlights the

862 heterogeneity of responses in the general population of cells, plotted as in Figure 3A and

863 **B. (Bi)** Schematic of method for constructing single-trial co-occurrence matrices. **(Bii)** A

864 sub-population of cells for one trial that highlights the how the response pattern was

865 determined. If a cell showed an increase in activity during the tone-puff window,  
866 compared to the pre-tone period, it was assigned a 1. **(Bii)** The outer product was taken  
867 of the vector of responses across the population with itself to generate a single trial co-  
868 occurrence matrix. This is a binary matrix where if the *i*th and *j*th cells both increase  
869 during the tone-puff window there is a 1, but a 0 otherwise. These individual trials can be  
870 combined as specific trials of interest, and clustered with spectral biclustering to identify  
871 neurons with the highest degree of co-activity across trial types. **(C)** Representative co-  
872 occurrence matrices. **(Ci)** Clustering based on co-occurrence matrix for the last 20 trials  
873 of the last training session from an example mouse. Note the clusters of cell pairs with  
874 high co-activity during the last session. **(Cii)** Co-occurrence matrix for all trials of the  
875 extinction session, with sorting maintained from the last training session matrix.  
876 Maintaining sorting shows a lack in co-activity between the same cell pairs that were  
877 present in the co-active clusters of the last training session. **(Ciii)** The same data as  
878 shown in Cii, re-clustered. Re-clustering the extinction matrix reveals separate  
879 populations of cell pairs that are highly co-active during the extinction session. **(D)**  
880 Connectivity maps created from co-occurrence matrices. **(Di)** Connectivity maps created  
881 from the last training session co-occurrence matrix shown in Ci (top) and extinction  
882 session co-occurrence matrix shown in Cii and Ciii (bottom). **(Dii)** Last training and  
883 extinction session network maps, overlaid. Edges from the last training session are shown  
884 in red, edges from the extinction session in blue, and edges present during both sessions  
885 are shown in black. Insets: Zoom-ins of four nodes. Note that there are very few edges  
886 that overlap (colored black) between the two behavioral conditions. **(E)** Quantification of  
887 the proportion of total edges of the last training and extinction sessions that were present



888 during last training session (red), extinction session (blue), or both (gray).  $p=0.0550$  for  
889 last vs extinction sessions,  $*p=0.0023$  for last session vs shared and  $p=0.0001$  for  
890 extinction session vs shared, paired two-tailed t-test.

891

892

893

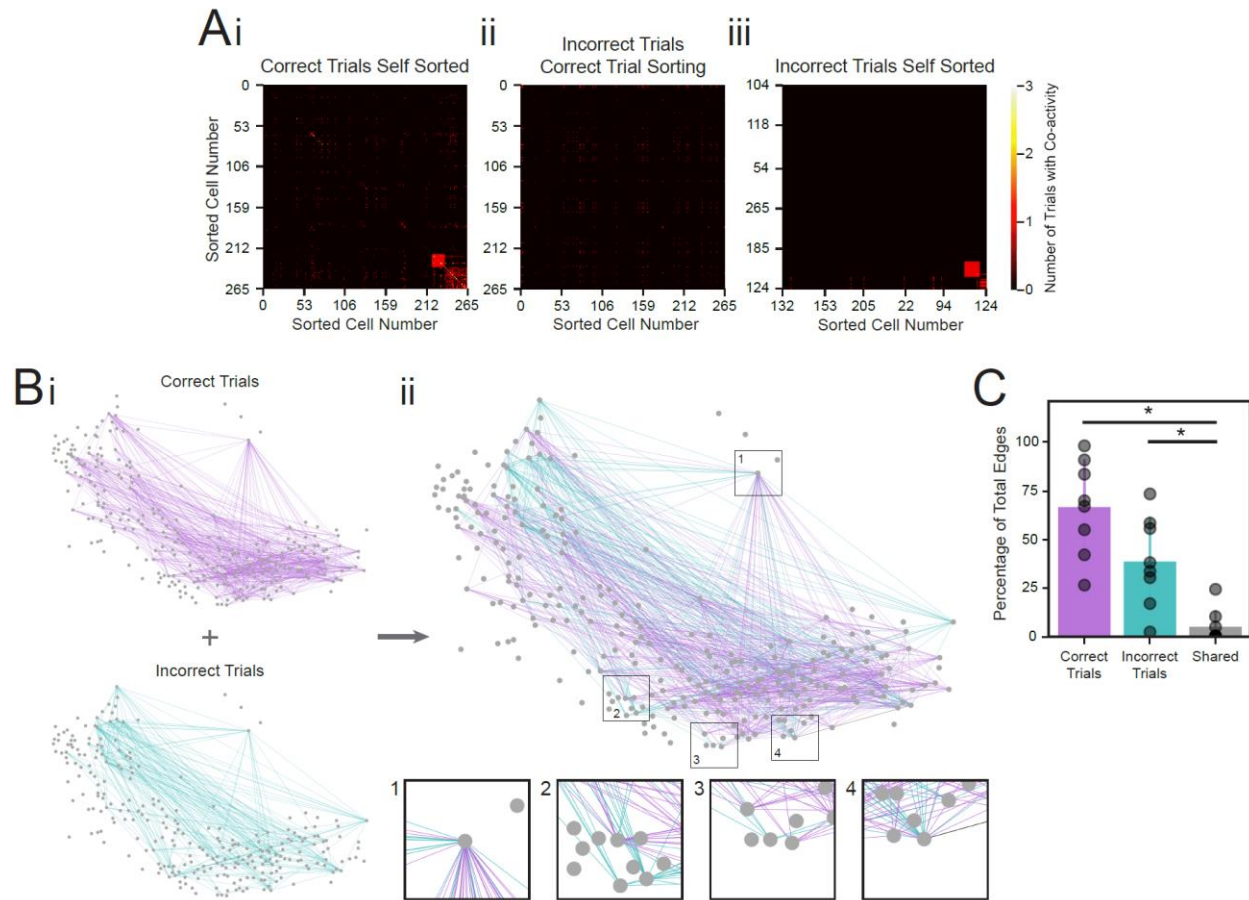

894

895 **Figure 5. Sub-populations of neuron pairs are differentially activated on trials with**

896 **different behavioral responses. (A)** Behaviorally-relevant co-occurrence matrices. **(Ai)**

897 Clustering based on co-occurrence matrix of last training session trials on which the

898 animal performed the correct behavioral response, for a representative animal. Note the

899 clusters of highly co-active cell pairs. **(Aii)** Co-occurrence matrix for the trials from the last

900 training session with the incorrect behavioral response for the same mouse. Sorting is

901 maintained from the last training session to compare co-activity of the same cell pairs

902 between behavioral conditions. Maintaining sorting shows the lack of strong co-activity

903 during incorrect trials in the cell pairs that were highly co-active on correct trials. **(Aiii)** The

904 same data as shown in Aii, re-clustered. Re-clustering reveals new populations of cell

905 pairs that are highly co-active on trials with the incorrect behavioral response. **(B)**

906 Connectivity maps created from co-occurrence matrices. **(Bi)** Connectivity maps created  
907 from the correct trials co-occurrence matrix shown in  $A_i$  (top) and incorrect trials co-  
908 occurrence matrix shown in  $A_{ii}$  and  $A_{iii}$  (bottom). **(Bii)** Correct and incorrect trial network  
909 maps, overlaid. Edges from correct trials are shown in purple, edges from incorrect trials  
910 in teal, and edges present during both trial types are shown in black. Insets: Zoom-ins of  
911 four nodes. Note that there are very few edges that overlap (colored black) between the  
912 two behavioral conditions. **(C)** Quantification of the proportion of total edges of the last  
913 training session that were present during correct trials (purple), incorrect trials (teal), or  
914 both (gray).  $p=0.1355$  for correct vs incorrect trials,  $*p=0.0001$  for correct trials vs shared  
915 and  $p=0.006$  for incorrect trials vs shared, paired two-tailed t-test.

916

917

918

919

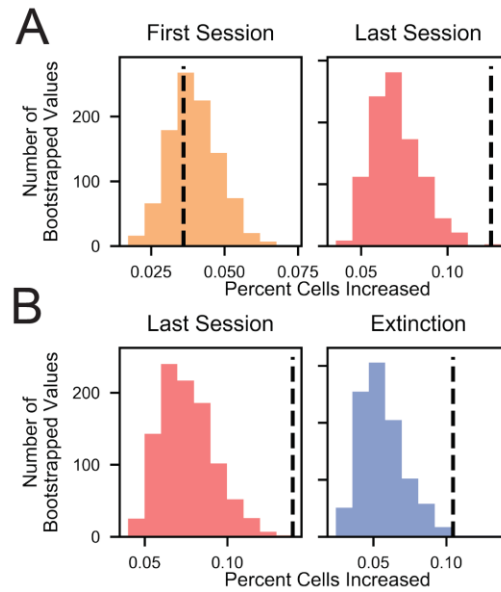

920

921 **Supplemental Figure 1. (A)** For the first session and last training session, bootstrapped  
922 distributions of the percentage of cells with an increase between the tone and puff after  
923 circularly shuffling the tone-puff locations 1000 times. Dashed black line shows  
924 percentage measured with the non-shuffled (experimental) tone-puff locations. **(B)**  
925 Bootstrapped distributions comparing the matched last session and extinction session  
926 recordings, computed similarly as in A.

927

928

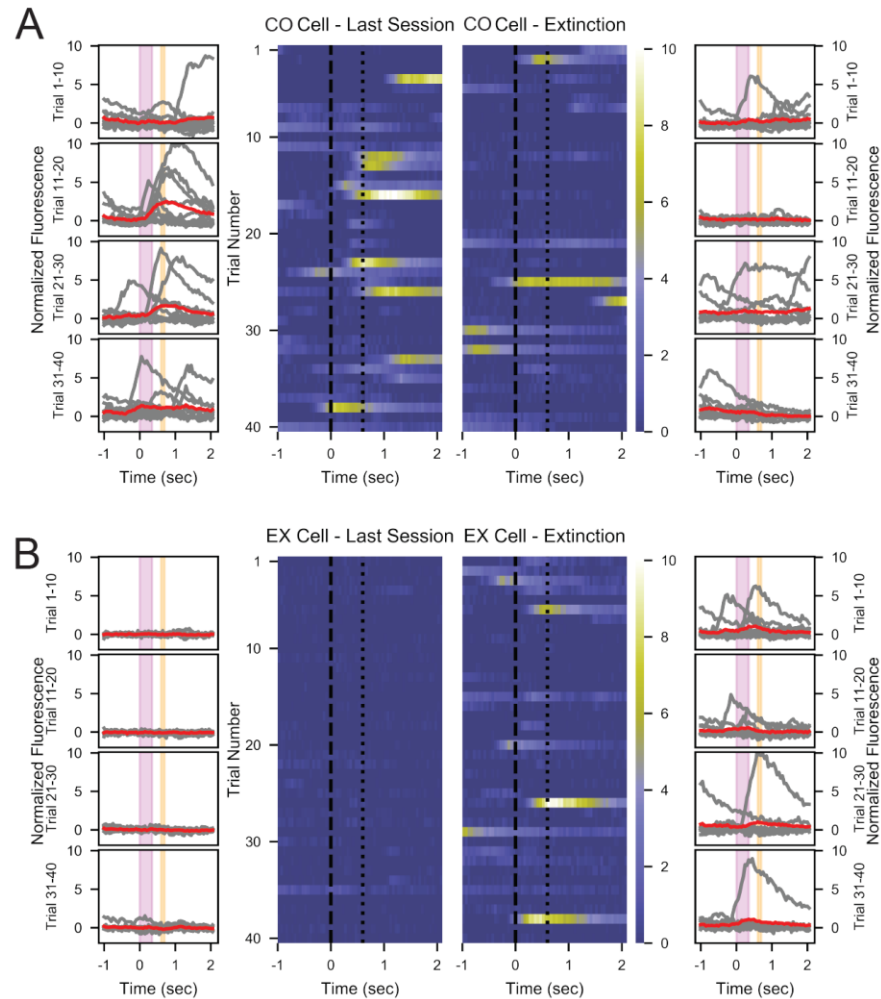

929

930 **Supplemental Figure 2.**

931 **(A)** Individual single trial responses for CO cell that shows an average level of responding  
932 on the last training session. Outer columns have individual trials shown in gray, with the  
933 10-trial average shown in red. The pink box corresponds to the tone interval, and the  
934 orange box corresponds to the puff. Center heat-maps show each trial for the window  
935 surrounding the tone-puff time. **(B)** The same as in A, for an EX cell that exhibits an  
936 average level of responding for extinction trials. Note the lack of response of these cells  
937 to the tone during the last training session.

938

939

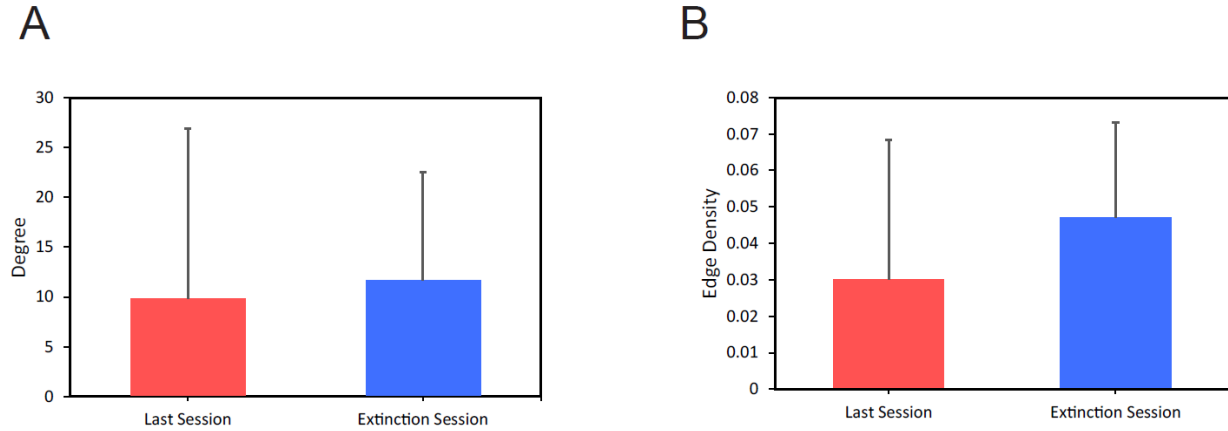

940

941 **Supplemental Figure 3.**

942 **(A)** Average degree and **(B)** density of connectivity maps for the last training and  
943 extinction sessions across all animals, shown mean + s.d.  $p=0.6022$  for average degree  
944 and  $p=0.2018$  for density, paired two-tailed t-test.

945

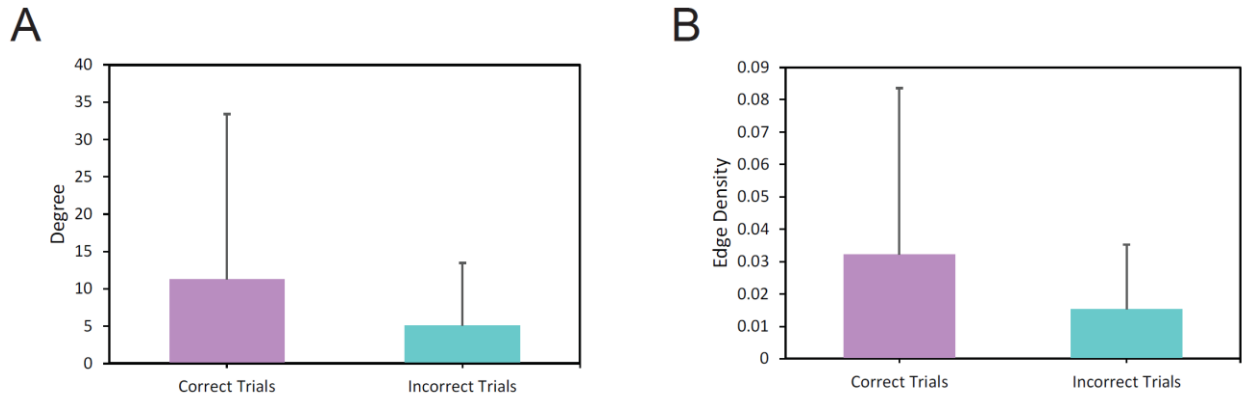

946

947 **Supplemental Figure 4.**

948 **(A)** Average degree and **(B)** density of connectivity maps for correct and incorrect trials  
949 across all animals, shown mean + s.d.  $p=0.2849$  for average degree and  $p=0.2258$  for  
950 density, paired two-tailed t-test.

951
